# Supplementary material for: Identification of a Fusarium ear rot resistance gene in maize by QTL mapping and RNA sequencing
Source: Front Plant Sci. 2022 Sep 13;13:954546. doi: 10.3389/fpls.2022.954546 (PMC9514021; doi:10.3389/fpls.2022.954546)
Supplement: Supplementary file 1 [file Table_1.XLSX]

## Sheet: Sheet2
	E1	E2	E3	E4	E5	E6	E7	E8	BLUP
ZYQ001	NA	NA	NA	NA	NA	NA	NA	NA	NA
ZYQ002	NA	NA	NA	NA	NA	NA	NA	NA	NA
ZYQ003	0.548	0.406	0.325	0.2685	0.3285	NA	0.406	0.546056	NA
ZYQ004	0.278	0.118	0.2105	0.1905	0.213	0.133	0.207692	0.399231	0.219
ZYQ005	0.378	0.294	0.419	0.1995	0.337	0.131	0.22	0.447619	0.303
ZYQ006	0.241	0.259	0.245	0.22	0.212	0.201	0.272222	0.344352	0.249
ZYQ007	0.34	NA	0.34	NA	0.3165	0.255	NA	NA	NA
ZYQ008	0.284	0.208	0.4105	0.208	0.4105	0.202	0.25	0.39	0.295
ZYQ009	0.196	0.147	0.3	0.252	0.122	0.151	0.210714	0.373268	0.219
ZYQ010	0.275	0.276	0.214	0.156	0.0955	NA	0.08875	0.302176	NA
ZYQ011	0.336	0.115	0.2405	0.095	0.217	NA	0.168182	0.368687	NA
ZYQ012	NA	NA	NA	NA	NA	NA	NA	NA	NA
ZYQ013	0.35	0.124	0.3415	0.12	0.1025	0.237	0.141176	0.412892	0.229
ZYQ014	0.63	0.271	0.364	0.307	0.349	0.392	0.055	0.538333	0.363
ZYQ015	0.418	0.38	0.3615	0.292	0.283	0.344	0.197059	0.533161	0.351
ZYQ016	0.261	0.179	0.1935	0.1285	0.1795	NA	0.0975	0.4625	NA
ZYQ017	0.339	0.347	0.407	0.343	0.3895	0.284	0.2	0.528205	0.355
ZYQ018	NA	NA	0.2845	NA	0.4405	NA	NA	NA	NA
ZYQ019	0.596	0.425	0.1565	0.2605	0.1765	NA	0.1375	0.445833	NA
ZYQ020	0.21	0.115	0.3505	0.0845	0.084	NA	0.179167	0.440863	NA
ZYQ021	0.421	0.298	0.1795	0.298	0.1795	0.273	0.081905	0.320357	0.256
ZYQ022	0.563	0.511	0.3405	0.3735	0.248	NA	0.153529	0.439553	NA
ZYQ023	NA	NA	NA	NA	NA	NA	NA	NA	NA
ZYQ024	0.127	0.137	0.1695	0.137	0.1695	NA	0.085	0.553182	NA
ZYQ025	0.168	0.312	0.394	0.312	0.373	0.376	0.076316	0.272924	0.285
ZYQ026	0.375	0.277	0.2625	0.191	0.1335	NA	0.127778	0.349158	NA
ZYQ027	0.301	0.179	0.3675	0.179	0.3675	NA	0.110526	0.303509	NA
ZYQ028	0.432	0.238	0.2785	0.1525	0.1805	NA	0.105	0.455	NA
ZYQ029	0.275	0.275	0.2745	0.161	0.1665	NA	0.11	0.329524	NA
ZYQ030	NA	NA	NA	NA	NA	NA	NA	NA	NA
ZYQ031	0.397	0.437	0.356	0.288	0.271	0.359	0.133333	0.533189	0.347
ZYQ032	0.583	0.279	0.379	0.225	0.349	0.456	0.104545	0.296515	0.334
ZYQ033	0.477	0.349	0.426	0.2565	0.359	0.355	0.15	0.317368	0.336
ZYQ034	0.79	0.64	0.497	0.64	0.497	NA	0.155556	0.210185	NA
ZYQ035	NA	NA	NA	NA	NA	NA	NA	NA	NA
ZYQ036	0.651	0.346	0.351	0.253	0.3045	0.418	0.103333	0.368431	0.349
ZYQ037	0.546	0.207	0.2825	0.164	0.2725	NA	0.192857	0.302747	NA
ZYQ038	0.579	0.457	0.478	0.3595	0.4805	NA	0.073333	0.286111	NA
ZYQ039	0.676	0.566	0.2335	0.446	0.227	NA	0.2	0.288889	NA
ZYQ040	0.643	0.617	0.4045	0.4875	0.2665	NA	0.32	0.51	NA
ZYQ041	NA	NA	NA	NA	NA	NA	NA	NA	NA
ZYQ042	NA	NA	NA	NA	NA	NA	NA	NA	NA
ZYQ043	0.363	0.503	0.2815	0.4125	0.2655	NA	0.395	0.665	NA
ZYQ044	0.743	0.647	0.5745	0.647	0.579	0.561	0.175	0.458333	0.548
ZYQ045	0.767	0.7	0.45	0.598	0.493	0.412	0.166667	0.352525	0.492
ZYQ046	0.53	0.623	0.6805	0.5345	0.4505	0.659	0.197059	0.653565	0.541
ZYQ047	0.759	0.575	0.3725	0.446	0.2765	0.483	0.065	0.230897	0.401
ZYQ048	0.801	0.703	0.479	0.6275	0.321	NA	0.183333	0.532222	NA
ZYQ049	0.449	0.487	0.2255	0.338	0.218	NA	0.073077	0.409359	NA
ZYQ050	0.581	0.443	0.2395	0.364	0.2905	0.289	0.225	0.591484	0.378
ZYQ051	0.537	0.578	0.4025	0.578	0.4025	0.406	0.126923	0.26453	0.412
ZYQ052	0.661	0.47	0.495	0.394	0.3865	0.486	0.083333	0.318254	0.412
ZYQ053	0.524	0.464	0.399	0.34	0.35	0.332	0.075	0.286111	0.346
ZYQ054	0.623	0.457	0.5605	0.392	0.369	0.349	0.121429	0.371905	0.406
ZYQ055	0.201	0.307	0.265	0.2955	0.1525	0.209	0.103571	0.322344	0.232
ZYQ056	0.259	NA	0.259	0.1415	0.174	NA	NA	NA	NA
ZYQ057	NA	NA	NA	NA	NA	NA	NA	NA	NA
ZYQ058	0.189	NA	0.189	0.1795	0.157	NA	NA	NA	NA
ZYQ059	0.614	0.444	0.258	0.3305	0.2445	0.341	0.061333	0.260737	0.319
ZYQ060	0.497	0.341	0.39	0.298	0.292	0.319	0.284375	0.448958	0.359
ZYQ061	NA	NA	NA	NA	NA	NA	NA	NA	NA
ZYQ062	0.641	0.505	0.4875	0.505	0.4875	NA	0.134615	0.521168	NA
ZYQ063	0.452	0.378	0.4325	0.2395	0.341	0.368	0.07619	0.303175	0.324
ZYQ064	0.295	0.549	0.6365	0.4485	0.5795	0.308	0.325	0.616905	0.47
ZYQ065	0.494	0.351	0.354	0.2355	0.1565	0.418	0.033333	0.259596	0.288
ZYQ066	NA	NA	NA	NA	NA	NA	NA	NA	NA
ZYQ067	0.276	0.467	0.3295	0.32	0.2705	0.313	0.073077	0.357692	0.301
ZYQ068	NA	NA	NA	NA	NA	NA	NA	NA	NA
ZYQ069	NA	NA	NA	NA	NA	NA	NA	NA	NA
ZYQ070	0.69	0.583	0.395	0.4355	0.2645	0.412	0.368182	0.504069	0.457
ZYQ071	0.324	0.33	0.2235	0.1645	0.1235	0.21	0.204545	0.483636	0.258
ZYQ072	NA	NA	NA	NA	NA	NA	NA	NA	NA
ZYQ073	0.5	0.276	0.258	0.1735	0.1645	0.347	0.204545	0.349867	0.284
ZYQ074	0.245	0.27	0.2275	0.2605	0.148	NA	0.194444	0.514815	NA
ZYQ075	0.374	0.204	0.3275	0.1395	0.097	0.293	0.127778	0.436532	0.25
ZYQ076	0.5	0.327	0.3755	0.1535	0.2045	NA	0.123636	0.33244	NA
ZYQ077	0.465	0.206	0.3925	0.0865	0.156	0.353	0.114286	0.476875	0.281
ZYQ078	0.604	0.576	0.593	0.269	0.494	0.406	0.183333	0.457937	0.448
ZYQ079	0.579	0.489	0.3255	0.323	0.213	0.532	0.127778	0.409259	0.375
ZYQ080	0.765	0.589	0.4615	0.395	0.3135	0.529	0.225	0.275	0.444
ZYQ081	0.252	0.205	0.2535	0.1365	0.1025	0.257	0.05	0.238462	0.187
ZYQ082	0.542	0.203	0.2095	0.1605	0.155	0.332	0.083333	0.331111	0.252
ZYQ083	0.364	0.264	0.219	0.139	0.1695	0.265	0.078571	0.503396	0.25
ZYQ084	0.778	0.359	0.471	0.2465	0.2065	0.578	0.2	0.54026	0.422
ZYQ085	0.6	0.218	0.2225	0.1265	0.157	0.373	0.175	0.351032	0.278
ZYQ086	0.565	0.323	0.3065	0.323	0.3065	0.464	0.092	0.364	0.343
ZYQ087	0.566	0.5	0.2195	0.3425	0.1485	NA	0.208333	0.482778	NA
ZYQ088	NA	0.179	0.28	0.179	0.28	NA	0.078571	0.475275	NA
ZYQ089	NA	NA	NA	NA	NA	NA	NA	NA	NA
ZYQ090	NA	NA	NA	NA	NA	NA	NA	NA	NA
ZYQ091	0.889	0.563	0.527	0.3495	0.3135	NA	0.078333	0.340397	NA
ZYQ092	0.389	0.403	0.208	0.3595	0.2065	NA	0.16	0.398704	NA
ZYQ093	0.715	0.501	0.437	0.337	0.344	0.412	0.101667	0.37101	0.402
ZYQ094	NA	0.326	0.317	0.2505	0.233	NA	0.2	0.448148	NA
ZYQ095	0.506	0.201	0.398	0.168	0.0985	0.338	0.125	0.385256	0.278
ZYQ096	0.523	0.383	0.346	0.383	0.346	NA	0.3	0.388148	NA
ZYQ097	0.608	0.499	0.2755	0.441	0.194	NA	0.166667	0.355556	NA
ZYQ098	NA	NA	0.414	NA	0.414	NA	0.36	0.36	NA
ZYQ099	NA	0.297	0.369	0.093	0.1845	NA	0.29	0.399963	NA
ZYQ100	0.429	0.246	0.2595	0.095	0.1635	0.27	0.1	0.355952	0.24
ZYQ101	0.725	0.397	0.3435	0.2595	0.3535	0.374	0.304545	0.518182	0.409
ZYQ102	0.556	0.391	0.4685	0.272	0.421	0.347	0.108333	0.376111	0.368
ZYQ103	0.571	0.376	0.446	0.376	0.446	NA	0.13	0.350476	NA
ZYQ104	NA	NA	NA	NA	NA	NA	NA	NA	NA
ZYQ105	0.607	0.499	0.4635	0.499	0.4635	NA	0.15	0.407778	NA
ZYQ106	0.429	0.446	0.348	0.401	0.2625	0.268	0.11875	0.466423	0.342
ZYQ107	0.604	0.291	0.377	0.224	0.266	0.358	0.1	0.343636	0.32
ZYQ108	NA	0.355	0.2875	0.292	0.3385	NA	0.157143	0.299048	NA
ZYQ109	NA	NA	NA	NA	NA	NA	NA	NA	NA
ZYQ110	0.734	0.365	0.395	0.3105	0.374	0.464	0.092	0.253394	0.374
ZYQ111	0.529	0.573	0.2285	0.4395	0.2315	0.336	0.161538	0.378291	0.36
ZYQ112	NA	NA	0.311	NA	0.311	NA	NA	NA	NA
ZYQ113	NA	NA	NA	NA	NA	NA	NA	NA	NA
ZYQ114	0.288	0.636	0.278	0.636	0.278	0.265	0.05	0.353611	0.348
ZYQ115	0.589	0.492	0.409	0.492	0.409	NA	0.038333	0.421508	NA
ZYQ116	NA	NA	NA	NA	NA	NA	NA	NA	NA
ZYQ117	0.694	0.465	0.339	0.2645	0.2665	0.424	0.083333	0.306111	0.355
ZYQ118	0.65	0.492	0.403	0.492	0.403	0.48	0.062	0.357232	0.417
ZYQ119	0.623	0.326	0.2245	0.232	0.143	0.296	0.066667	0.235556	0.268
ZYQ120	NA	NA	NA	NA	NA	NA	NA	NA	NA
ZYQ121	0.158	0.175	0.1265	0.0645	0.117	0.113	0.081	0.472614	0.164
ZYQ122	0.102	0.164	0.147	0.067	0.1175	0.141	0.13	0.38037	0.156
ZYQ123	0.781	0.477	0.5995	0.3245	0.3905	0.408	0.03	0.321111	0.416
ZYQ124	0.249	0.247	0.2475	0.247	0.2475	0.271	0.03	0.332969	0.234
ZYQ125	0.526	0.297	0.3435	0.1725	0.1305	0.242	0.066667	0.263492	0.255
ZYQ126	0.315	0.235	0.1725	0.157	0.142	0.176	0.1	0.280952	0.197
ZYQ127	0.359	0.218	0.292	0.0985	0.157	0.283	0.036667	0.321746	0.221
ZYQ128	0.439	0.356	0.2475	0.1515	0.173	0.23	0.09	0.256667	0.243
ZYQ129	0.382	0.399	0.3355	0.1815	0.2315	0.38	0.1	0.410119	0.302
ZYQ130	NA	NA	NA	NA	NA	NA	NA	NA	NA
ZYQ131	0.351	0.206	0.347	0.261	0.1935	0.249	0.222222	0.409544	0.28
ZYQ132	0.406	0.374	0.337	0.158	0.1705	0.274	0.127143	0.34042	0.273
ZYQ133	0.462	NA	0.462	0.3195	0.341	NA	NA	NA	NA
ZYQ134	0.38	0.31	0.3675	0.2075	0.153	0.274	0.272	0.340204	0.288
ZYQ135	NA	0.334	0.215	0.146	0.228	NA	0.072857	0.307619	NA
ZYQ136	0.573	0.294	0.266	0.29	0.2535	0.341	0.042222	0.297407	0.295
ZYQ137	0.328	0.186	0.263	0.259	0.2225	0.255	0.0525	0.297857	0.233
ZYQ138	0.437	0.32	0.422	0.231	0.333	NA	0.053333	0.269293	NA
ZYQ139	NA	NA	NA	0.3525	0.2765	0.514	NA	NA	NA
ZYQ140	0.322	0.332	0.321	0.262	0.4375	0.303	0.078889	0.373915	0.304
ZYQ141	0.527	0.225	0.341	0.2265	0.268	0.122	0.104615	0.290427	0.263
ZYQ142	0.364	0.345	0.3335	0.2675	0.268	0.228	0.13	0.326667	0.283
ZYQ143	0.472	0.31	0.198	0.2895	0.264	0.2	0.295833	0.490357	0.315
ZYQ144	0.587	0.376	0.354	0.263	0.329	0.189	0.153571	0.495635	0.343
ZYQ145	0.679	0.495	0.2165	0.2435	0.2055	0.19	0.1975	0.501731	0.341
ZYQ146	0.272	0.274	0.4355	0.2785	0.242	0.423	0.118889	0.314233	0.295
ZYQ147	0.526	0.312	0.42	0.4095	0.243	0.324	0.03	0.376667	0.33
ZYQ148	0.428	0.258	0.311	0.2045	0.286	0.098	0.15625	0.362259	0.263
ZYQ149	0.482	0.37	0.2585	0.228	0.2875	0.317	0.073636	0.371515	0.299
ZYQ150	0.334	0.486	0.211	NA	NA	NA	0.686923	0.562308	NA
ZYQ151	0.338	0.28	0.1775	0.1375	0.3075	0.234	0.06	0.286667	0.228
ZYQ152	0.497	0.353	0.312	0.253	0.2	0.331	0.515385	0.444943	0.363
ZYQ153	0.576	0.505	0.376	0.51	0.406	0.477	0.115625	0.497169	0.433
ZYQ154	0.469	0.524	0.208	0.346	0.2335	0.325	0.091667	0.283889	0.31
ZYQ155	0.551	0.489	0.415	0.2355	0.531	0.497	0.25	0.622727	0.449
ZYQ156	NA	NA	NA	0.193	0.2495	NA	NA	NA	NA
ZYQ157	0.78	0.558	0.5465	0.275	0.39	0.581	0.101111	0.431481	0.458
ZYQ158	NA	NA	NA	0.3795	0.381	NA	NA	NA	NA
ZYQ159	0.531	0.526	0.3335	0.188	0.2105	0.301	0.106667	0.453175	0.331
ZYQ160	0.412	0.216	0.2235	0.235	0.471	0.259	0.089412	0.312767	0.277
ZYQ161	0.507	0.481	0.3095	NA	NA	0.316	0.075	0.35	NA
ZYQ162	0.357	0.262	0.2365	0.1955	0.213	0.234	0.133889	0.413677	0.256
ZYQ163	0.218	0.185	0.1865	0.172	0.2255	0.169	0.036667	0.242991	0.179
ZYQ164	0.549	0.18	0.336	0.2705	0.1775	0.208	0.075385	0.393382	0.274
ZYQ165	0.322	0.368	0.3245	0.3535	0.3025	0.214	0.435	0.588333	0.363
ZYQ166	0.436	0.247	0.189	0.2495	0.299	0.188	0.101	0.367808	0.26
ZYQ167	NA	0.301	0.227	0.267	0.251	NA	0.15	0.276667	NA
ZYQ168	0.363	NA	0.363	0.2605	0.279	NA	NA	NA	NA
ZYQ169	0.382	NA	0.328	0.183	0.211	NA	NA	NA	NA
ZYQ170	0.502	0.276	0.406	0.3695	0.209	0.273	0.078333	0.346919	0.308
ZYQ171	0.552	0.612	0.281	0.1495	0.2695	0.332	0.190625	0.431218	0.352
ZYQ172	0.591	0.692	0.372	0.2795	0.3415	0.557	0.133333	0.391895	0.42
ZYQ173	0.271	0.37	0.2505	0.161	0.5815	0.202	0.155	0.441197	0.304
ZYQ174	0.648	0.406	0.2895	0.254	0.44	0.372	0.140714	0.434683	0.373
ZYQ175	NA	NA	NA	0.1985	0.301	NA	NA	NA	NA
ZYQ176	0.408	0.365	0.297	0.24	0.177	0.268	0.06	0.256296	0.259
ZYQ177	0.42	0.475	0.3965	0.2775	0.3015	0.306	0.134615	0.29765	0.326
ZYQ178	0.312	0.347	0.25	0.2545	0.2175	0.305	0.111818	0.32645	0.266
ZYQ179	NA	NA	NA	0.442	0.3205	NA	NA	NA	NA
ZYQ180	0.44	0.149	0.313	0.176	0.163	0.21	0.137	0.355078	0.243
ZYQ181	0.227	0.235	0.296	0.3105	0.38	0.267	0.592857	0.483016	0.349
ZYQ182	0.712	0.359	0.3195	0.2755	0.1915	0.268	0.145	0.440556	0.339
ZYQ183	0.526	0.229	0.314	0.223	0.228	0.22	0.21	0.318148	0.284
ZYQ184	0.71	0.612	0.598	NA	NA	0.561	0.134667	0.375658	NA
ZYQ185	0.297	0.222	0.3735	0.2605	0.193	0.22	0.135714	0.398016	0.262
ZYQ186	0.796	0.809	0.573	0.295	0.5215	0.414	0.253571	0.480281	0.518
ZYQ187	0.508	0.517	0.4165	0.2575	0.2525	0.294	0.1875	0.48344	0.365
ZYQ188	0.719	0.54	0.4135	0.2055	0.1815	0.319	0.055	0.229781	0.333
ZYQ189	NA	NA	NA	0.167	0.181	NA	NA	NA	NA
ZYQ190	0.112	0.198	0.27	0.1735	0.304	0.164	0.27	0.290513	0.223
ZYQ191	NA	NA	NA	0.1755	0.3205	NA	NA	NA	NA
ZYQ192	0.454	0.264	0.4255	NA	NA	0.404	0.233333	0.33328	NA
ZYQ193	0.271	0.248	0.168	0.1945	0.175	0.144	0.081818	0.332035	0.202
ZYQ194	0.441	0.528	0.4375	0.256	0.238	0.274	0.2	0.341667	0.34
ZYQ195	0.514	0.319	0.1805	0.196	0.2125	0.206	0.075	0.330455	0.254
ZYQ196	0.467	0.294	0.1715	0.2535	0.1875	0.289	0.1	0.270833	0.254
ZYQ197	0.439	0.268	0.1845	0.323	0.1615	0.337	0.4	0.314286	0.303
ZYQ198	0.657	0.306	0.2115	0.164	0.17	0.278	0.08	0.245079	0.264
ZYQ199	0.353	0.497	0.4275	NA	NA	0.327	0.125	0.285476	NA
ZYQ200	0.631	0.501	0.474	0.3935	0.314	0.36	0.192857	0.274008	0.392
ZYQ201	0.727	0.384	0.2655	NA	NA	NA	0.333333	0.320635	NA
ZYQ202	0.587	0.567	0.2885	NA	NA	0.261	0.1	0.279487	NA
ZYQ203	NA	NA	NA	0.443	0.445	NA	NA	NA	NA
ZYQ204	0.347	0.505	0.335	NA	NA	0.316	0.14375	0.243995	NA
ZYQ205	0.315	0.377	0.3665	0.207	0.2555	0.259	0.116667	0.297222	0.274
ZYQ206	0.291	0.19	0.2875	0.1415	0.23	0.205	0.076667	0.352456	0.222
ZYQ207	0.799	0.599	0.3925	0.3645	0.519	0.399	0.205556	0.358215	0.455
ZYQ208	0.511	0.385	0.3835	0.2455	0.2905	NA	0.326923	0.473077	NA
ZYQ209	0.212	0.38	0.313	0.341	0.295	0.212	0.2	0.505882	0.307
ZYQ210	0.721	0.627	0.5825	0.4285	0.4005	0.429	0.161765	0.525033	0.484
ZYQ211	NA	NA	0.224	NA	0.236	NA	NA	NA	NA
ZYQ212	0.64	0.434	0.327	0.1575	0.199	0.269	0.295833	0.4275	0.344
ZYQ213	0.42	0.401	0.347	NA	0.347	0.282	0.071429	0.323136	NA
ZYQ214	0.616	0.579	0.4545	NA	0.4545	0.429	0.1625	0.3425	NA
ZYQ215	0.598	0.47	0.285	0.35	0.2175	0.436	0.087273	0.32835	0.346
ZYQ216	NA	NA	NA	NA	NA	NA	NA	NA	NA
ZYQ217	0.833	0.613	0.486	0.421	0.4155	0.411	0.105556	0.348519	0.454
ZYQ218	0.666	0.465	0.2365	0.324	0.224	0.309	0.0875	0.349167	0.333
ZYQ219	0.305	0.351	0.238	0.259	0.2155	0.191	0.083333	0.338205	0.248
ZYQ220	0.294	0.339	0.156	0.2775	0.2665	0.255	0.128571	0.44619	0.27
ZYQ221	0.407	0.333	0.269	0.1895	0.2515	0.235	0.216667	0.361508	0.283
ZYQ222	NA	NA	0.1305	0.1555	0.188	NA	NA	NA	NA
ZYQ223	0.587	0.224	0.166	0.178	0.1905	0.245	0.095455	0.319493	0.251
ZYQ224	0.179	0.33	0.1525	0.1795	0.166	0.17	0.117857	0.261264	0.195
ZYQ225	NA	NA	0.3365	0.245	0.216	NA	NA	NA	NA
ZYQ226	0.224	0.229	0.252	0.1605	0.1925	0.162	0.16875	0.33375	0.215
ZYQ227	0.281	0.294	0.237	0.155	0.1925	0.205	0.20625	0.377841	0.244
ZYQ228	0.531	0.261	0.242	0.323	0.2715	0.197	0.13125	0.36875	0.291
ZYQ229	NA	NA	0.286	0.162	0.2295	NA	NA	NA	NA
ZYQ230	NA	NA	NA	NA	NA	NA	NA	NA	NA
ZYQ231	0.677	0.488	0.2605	NA	NA	0.383	0.216667	0.352222	NA
ZYQ232	0.877	0.58	0.506	0.2585	0.3875	0.616	0.1	0.35303	0.46
ZYQ233	NA	NA	NA	NA	NA	NA	NA	NA	NA
ZYQ234	NA	NA	0.2295	0.2615	0.232	NA	NA	NA	NA
ZYQ235	NA	NA	0.145	0.152	0.214	NA	NA	NA	NA
ZYQ236	NA	NA	NA	0.3865	0.3685	NA	NA	NA	NA
ZYQ237	0.503	0.341	0.2555	0.237	0.2035	0.311	0.133333	0.281566	0.283
ZYQ238	0.592	0.417	0.3825	0.299	0.2245	0.449	0.183333	0.341111	0.361
ZYQ239	NA	NA	NA	0.2145	0.1555	NA	NA	NA	NA
ZYQ240	0.647	0.135	0.155	0.2235	0.168	0.398	0.125	0.287698	0.267
ZYQ241	0.58	0.16	0.5325	0.3425	0.2515	NA	0.265	0.550897	NA
ZYQ242	NA	NA	0.29	0.22	0.2935	NA	NA	NA	NA
ZYQ243	NA	NA	0.3515	0.235	0.3045	NA	NA	NA	NA
ZYQ244	0.309	0.307	0.171	0.22	0.232	NA	0.253846	0.517557	NA
ZYQ245	0.799	0.475	0.3975	0.275	0.2375	0.461	0.08	0.282857	0.376
ZYQ246	NA	NA	0.221	0.179	0.249	NA	NA	NA	NA
ZYQ247	0.242	0.286	0.266	0.3585	0.3435	NA	0.283333	0.321717	NA
ZYQ248	NA	0.311	0.1885	0.185	0.1885	NA	0.1125	0.312958	NA
ZYQ249	0.215	0.434	0.323	0.5065	0.454	0.433	0.166667	0.411919	0.368
ZYQ250	0.237	0.425	0.3495	0.188	0.328	NA	0.579167	0.576389	NA
ZYQ251	0.665	0.227	0.385	NA	NA	0.312	0.116667	0.344771	NA
ZYQ252	0.426	0.237	0.273	0.2625	0.243	NA	0.164286	0.428095	NA
ZYQ253	0.486	0.338	0.226	0.2645	0.2575	0.221	0.116667	0.357407	0.283
ZYQ254	0.83	0.63	0.465	0.4015	0.364	0.52	0.13125	0.416766	0.47
ZYQ255	NA	NA	0.3165	0.2635	0.299	NA	NA	NA	NA
ZYQ256	NA	NA	0.365	0.28	0.277	NA	NA	NA	NA
ZYQ257	0.529	0.324	0.266	0.147	0.244	0.195	0.233333	0.449206	0.298
ZYQ258	0.175	0.116	0.2015	NA	NA	NA	0.01	0.39037	NA
ZYQ259	0.673	0.324	0.402	NA	NA	0.337	0.121429	0.415604	NA
ZYQ260	0.17	0.131	0.1825	0.2295	0.226	NA	0.083333	0.280952	NA
ZYQ261	NA	NA	NA	0.267	0.249	NA	NA	NA	NA
ZYQ262	0.433	0.251	0.25	0.2455	0.2785	0.184	0.2	0.446667	0.286
ZYQ263	0.486	0.229	0.256	0.3745	0.2165	0.217	0.083333	0.416667	0.285
ZYQ264	0.48	0.351	0.274	0.1745	0.2275	0.207	0.075	0.430556	0.277
ZYQ265	0.356	0.244	0.33	0.191	0.256	0.21	0.177273	0.475079	0.28
ZYQ266	0.355	0.369	0.307	NA	NA	NA	0.094444	0.32037	NA
ZYQ267	0.538	0.272	0.3145	0.229	0.318	0.269	0.278571	0.381234	0.325
ZYQ268	0.189	0.398	0.1595	0.1655	0.2185	NA	0.48125	0.517992	NA
ZYQ269	0.127	NA	0.2195	0.2545	0.2645	NA	NA	NA	NA
ZYQ270	0.696	0.41	0.447	0.296	0.417	0.494	0.0875	0.345357	0.399
ZYQ271	0.622	0.412	0.455	0.347	0.31	0.336	0.0625	0.383796	0.366
ZYQ272	0.21	0.253	0.3455	0.202	0.269	0.19	0.116667	0.31	0.237
ZYQ273	0.472	0.192	0.2235	0.2045	0.235	0.189	0.071429	0.317143	0.238
ZYQ274	0.592	0.255	0.48	0.2555	0.453	0.366	0.191667	0.446895	0.38
ZYQ275	0.114	0.219	0.3035	0.278	0.2435	0.303	0.181818	0.381347	0.253
ZYQ276	0.322	0.264	0.1955	0.153	0.1875	0.143	0.185714	0.452381	0.238
ZYQ277	0.302	0.338	0.2755	0.205	0.182	NA	0.285	0.511835	NA
ZYQ278	0.578	0.379	0.253	0.224	0.2735	0.255	0.225	0.511364	0.337
ZYQ279	0.796	0.593	0.3945	0.2105	0.291	0.545	0.138889	0.477249	0.431
ZYQ280	0.55	0.696	0.3535	0.36	0.4095	0.536	0.091667	0.362381	0.42
ZYQ281	NA	NA	NA	NA	NA	NA	NA	NA	NA
ZYQ282	0.491	0.378	0.1805	0.2515	0.2385	0.354	0.12	0.351868	0.296
ZYQ283	0.457	0.281	0.2345	0.1955	0.209	0.294	0.115	0.438862	0.278
ZYQ284	0.362	0.272	0.238	0.154	0.2985	0.329	0.1125	0.369881	0.267
ZYQ285	0.698	0.354	0.337	0.2335	0.332	NA	0.128571	0.303772	NA
ZYQ286	0.361	0.344	0.366	0.194	0.302	0.339	0.153125	0.456924	0.314
ZYQ287	0.631	0.239	0.224	0.2565	0.223	NA	0.133333	0.459596	NA
ZYQ288	0.682	0.411	0.3135	0.263	0.2755	0.436	0.178571	0.384524	0.368
ZYQ289	0.448	0.4	0.309	0.184	0.217	NA	0.236429	0.434272	NA
ZYQ290	0.271	0.182	0.229	0.1485	0.1815	0.163	0.095833	0.394167	0.208
ZYQ291	0.71	0.32	0.3855	0.343	0.303	0.49	0.255556	0.462963	0.409
ZYQ292	0.463	0.421	0.2085	0.427	0.2515	NA	0.205	0.501472	NA
ZYQ293	NA	NA	0.206	0.1435	0.2445	NA	NA	NA	NA
ZYQ294	0.585	0.505	0.2085	0.2365	0.25	0.37	0.25	0.494444	0.362
ZYQ295	0.489	0.562	0.647	NA	NA	0.523	0.172222	0.586638	NA
ZYQ296	0.323	0.289	0.3925	0.1525	0.284	0.347	0.2	0.593846	0.323
ZYQ297	0.444	0.301	0.2325	0.1405	0.3565	0.431	0.19	0.49369	0.324
ZYQ298	0.346	0.326	0.2935	0.287	0.2945	NA	0.154167	0.501389	NA
ZYQ299	0.315	0.382	0.4185	0.137	0.208	NA	0.107143	0.448677	NA
ZYQ300	0.665	0.171	0.146	0.179	0.2565	NA	0.213636	0.427508	NA
ZYQ301	0.403	0.347	0.302	NA	NA	NA	0.13	0.329259	NA
ZYQ302	0.679	0.44	0.294	0.237	0.395	0.409	0.227778	0.42138	0.388
ZYQ303	0.749	0.394	0.4415	0.2665	0.327	0.423	0.15	0.313636	0.383
ZYQ304	0.636	0.211	0.184	NA	NA	0.246	0.211538	0.390883	NA
ZYQ305	0.358	0.095	0.1425	0.1575	0.187	NA	0.18	0.365882	NA
ZYQ306	0.586	0.345	0.306	0.1405	0.255	0.256	0.3	0.453021	0.33
ZYQ307	0.425	0.406	0.24	0.2145	0.302	NA	0.157143	0.308278	NA
ZYQ308	0.443	0.274	0.525	0.174	0.249	0.271	0.233333	0.581111	0.344
ZYQ309	0.303	0.198	0.3485	0.181	0.269	0.211	0.10625	0.409154	0.253
ZYQ310	0.681	0.365	0.481	0.258	0.342	0.414	0.085	0.370152	0.374
ZYQ311	0.562	0.295	0.2605	0.303	0.405	0.329	0.25	0.41365	0.352
ZYQ312	0.593	0.485	0.315	0.2595	0.3265	0.37	0.175	0.339815	0.358
ZYQ313	0.131	0.168	0.3445	0.2325	0.274	NA	0.4875	0.5125	NA
ZYQ314	0.544	0.565	0.333	0.1755	0.314	0.418	0.1875	0.33228	0.359
ZYQ315	0.759	0.434	0.3545	0.3585	0.4725	0.515	0.236111	0.359656	0.436
ZYQ316	0.772	0.53	0.4195	0.3495	0.248	0.546	0.3	0.488095	0.457
ZYQ317	NA	NA	NA	NA	NA	NA	NA	NA	NA
ZYQ318	0.783	0.427	0.4625	NA	NA	NA	0.195833	0.420429	NA
ZYQ319	0.375	0.51	0.161	0.181	0.261	0.286	0.145	0.295808	0.277
ZYQ320	0.55	0.47	0.5715	NA	NA	NA	0.23125	0.552083	NA
ZYQ321	NA	NA	NA	0.371	0.374	NA	NA	NA	NA
ZYQ322	0.434	0.342	0.295	0.4355	0.2725	0.562	0.170833	0.198611	0.339
ZYQ323	0.645	0.459	0.348	0.235	0.266	0.453	0.283333	0.447824	0.392
ZYQ324	0.753	0.577	0.2225	NA	NA	NA	0.25625	0.329861	NA
ZYQ325	0.37	0.52	0.296	0.3205	0.283	NA	0.14	0.198519	NA
ZYQ326	0.48	0.498	0.473	NA	NA	NA	0.28	0.308889	NA
ZYQ327	0.612	0.404	0.22	0.3	0.2295	0.502	0.243333	0.351481	0.358
ZYQ328	0.527	0.309	0.2345	0.343	0.1885	0.331	0.255556	0.416595	0.326
ZYQ329	0.256	0.27	0.249	0.2	0.226	NA	0.092308	0.312317	NA
ZYQ330	0.363	0.377	0.234	0.226	0.3405	0.298	0.14	0.268889	0.281
ZYQ331	0.409	0.332	0.299	NA	NA	0.292	0.173333	0.273056	NA
ZYQ332	0.69	0.647	0.248	0.376	0.3115	0.39	0.303125	0.334058	0.412
ZYQ333	0.46	0.45	0.2845	0.3105	0.3355	NA	0.1	0.21463	NA
ZYQ334	0.667	0.335	0.3705	0.3465	0.39	NA	0.153333	0.286707	NA
ZYQ335	0.456	0.35	0.206	0.1935	0.313	0.288	0.153846	0.364569	0.291
ZYQ336	0.778	0.472	0.2825	0.279	0.225	0.407	0.104167	0.275463	0.353
ZYQ337	NA	NA	NA	0.209	0.3205	NA	NA	NA	NA
ZYQ338	0.287	0.534	0.4355	0.2995	0.3305	NA	0.310714	0.554127	NA
ZYQ339	0.247	0.321	0.2115	0.2055	0.3395	0.227	0.05	0.27963	0.235
ZYQ340	0.183	0.298	0.2665	0.245	0.21	NA	0.06875	0.309754	NA
ZYQ341	0.294	0.262	0.3115	0.2055	0.248	0.218	0.06875	0.479735	0.261
ZYQ342	0.212	0.257	0.188	0.145	0.2185	0.172	0.06	0.383636	0.205
ZYQ343	0.544	0.324	0.263	0.2375	0.2745	0.304	0.059091	0.413607	0.302
ZYQ344	0.424	0.281	0.2025	0.1865	0.3045	0.305	0.053333	0.355556	0.264
ZYQ345	0.666	0.322	0.1855	0.1645	0.219	0.244	0.142308	0.347436	0.286
ZYQ346	0.314	0.274	0.335	NA	NA	0.225	0.116667	0.417806	NA
ZYQ347	0.035	0.328	0.2795	0.231	0.189	0.149	0.085714	0.395238	0.212
ZYQ348	0.323	0.481	0.5695	0.2615	0.394	0.376	0.226923	0.588022	0.403
ZYQ349	0.303	0.441	0.352	0.241	0.3395	0.281	0.259091	0.558586	0.347
ZYQ350	0.342	0.244	0.316	0.135	0.2105	0.362	0.071429	0.406217	0.261
ZYQ351	0.72	0.365	0.3365	NA	NA	NA	0.069231	0.313236	NA
ZYQ352	0.373	0.479	0.3225	NA	NA	0.43	0.145833	0.4933	NA
ZYQ353	0.575	0.39	0.3365	0.2045	0.273	0.359	0.034286	0.390317	0.32
ZYQ354	NA	NA	0.1775	NA	NA	NA	NA	NA	NA
ZYQ355	NA	NA	0.2055	NA	NA	NA	NA	NA	NA
ZYQ356	0.401	0.336	0.4565	NA	NA	0.271	0.154167	0.545328	NA
ZYQ357	0.366	0.331	0.3165	0.2435	0.213	0.242	0.24375	0.557008	0.314
ZYQ358	0.543	0.368	0.172	0.2155	0.191	0.239	0.107692	0.566154	0.3
ZYQ359	NA	NA	NA	0.176	0.211	NA	NA	NA	NA
ZYQ360	NA	NA	NA	NA	0.2915	NA	NA	NA	NA
ZYQ361	0.27	0.272	0.311	0.145	0.2505	0.244	0.1	0.464286	0.257
ZYQ362	0.257	0.219	0.371	0.125	0.2275	NA	0.09	0.33	NA
ZYQ363	0.295	0.247	0.2075	0.178	0.2725	0.197	0.10625	0.366528	0.234
ZYQ364	0.666	0.415	0.4005	0.3265	0.2155	0.381	0.20625	0.472413	0.385
ZYQ365	NA	NA	NA	0.203	0.1955	NA	NA	NA	NA
